# Supplementary material for: Angle-resolved plasmonic photocapacitance of gold nanorod dimers
Source: Royal Society of Chemistry journal article supplement (doi:10.1039/d3na00061c), 2023-01-01
Supplement: d3na00061c1.pdf [file d3na00061c1.pdf]

## Electronic Supplementary Information

### Angle-resolved plasmonic photocapacitance of gold nanorod dimers

Sudip Kumar Pal,<sup>a</sup> Dorothy Bardhan,<sup>a</sup> Debarun Sen,<sup>a</sup> Hirak Chatterjee<sup>a</sup>  
and Sujit Kumar Ghosh<sup>b\*</sup>

<sup>a</sup>Department of Chemistry, Assam University, Silchar-788011, India

<sup>b</sup>Physical Chemistry Section, Department of Chemistry, Jadavpur University,  
Kolkata-700032, India

E-mail: skghosh.chemistry@jadavpuruniversity.in; Tel: +91-33-24572770

#### SI 1. Detailed Calculations of the Capacitance

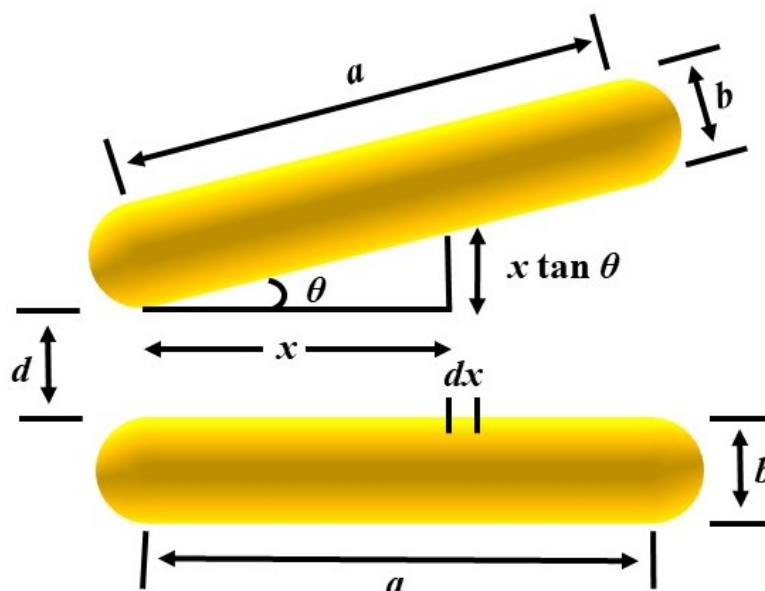

The capacitor model for nanorod dimer consists of two contributions. First, the classical capacitance ( $C_C$ ) which can be calculated considering the angle between the nanorods as parallel plates. The small capacitance ( $dC_C$ ) generated due to a small increase in the length ' $dx$ ' of the plates (rods) can be given as,

$$dC_C = \frac{\epsilon_r \cdot \epsilon_0 \cdot b \cdot dx}{d + x \tan \theta}$$

The overall capacitance can be calculated by integrating  $dC_C$  from 0 to  $C_C$  when  $x$  changes from 0 to  $a$ .

$$\begin{aligned}
C_C &= \int_0^{C_c} dC_C = \int_0^a \frac{\varepsilon_r \cdot \varepsilon_0 \cdot b \cdot dx}{d + x \tan \theta} \\
&= \varepsilon_r \cdot \varepsilon_0 \cdot b \int_0^a \frac{dx}{d + x \tan \theta} \\
&= \varepsilon_r \cdot \varepsilon_0 \cdot b \left[ \frac{1}{\tan \theta} \ln(x \tan \theta + d) \right]_0^a \\
&= \varepsilon_r \cdot \varepsilon_0 \cdot b \left[ \frac{1}{\tan \theta} \{ \ln(a \tan \theta + d) - \ln d \} \right] \\
&= \frac{\varepsilon_r \cdot \varepsilon_0 \cdot b}{\tan \theta} \left[ \ln\left(1 + \frac{a}{d} \tan \theta\right) \right]
\end{aligned}$$

The second contribution is the quantum capacitance  $C_Q$  that arises due to the fact that the plates under consideration have only thousands of atoms and density of states (DoS) is finite in case of the metal electrodes (nanorods). The contribution due to quantum capacitance,  $C_Q$  is given by,

$$C_Q = \frac{\sqrt{\varepsilon_r \varepsilon_0} A}{\gamma_{TF}}$$

where,  $\varepsilon_r$  is the dielectric constant of the material present in the electrode and  $\gamma_{TF}$  the Thomas Fermi screening length. The overall capacitance can be simplified into the form,

$$\frac{1}{C} = \left( \frac{2}{C_Q} + \frac{1}{C_C} \right)$$
